# Supplementary material for: Neural correlates of tactile hardness intensity perception during active grasping
Source: PeerJ. 2021 Aug 2;9:e11760. doi: 10.7717/peerj.11760 (PMC8340901; doi:10.7717/peerj.11760)
Supplement: Supplemental Information 3 — The first and second columns are the stimuli given to the participant (“1” means H28 stimulus, “4” means H57 stimulus). The third column is the responses from participants regarding differences in hardness between stimuli. [file peerj-09-11760-s003.xlsx]

## Sheet: Sub1
3	2	60
2	3	30
4	2	100
3	3	10
4	4	0
2	4	50
1	3	80
4	1	100
2	2	10
1	4	70
2	1	20
4	3	50
1	2	50
1	1	0
3	4	50
3	1	70
3	3	10
4	3	50
3	4	20
2	1	20
2	4	80
1	4	90
4	1	80
2	3	40
1	3	80
4	4	10
2	2	0
3	2	20
3	1	60
1	1	10
1	2	10
4	2	70
2	4	80
2	2	10
4	1	90
1	4	90
1	2	50
2	3	60
4	3	30
3	4	10
2	1	10
3	2	70
1	3	80
1	1	20
4	2	20
4	4	0
3	1	60
3	3	10
1	1	0
2	3	50
3	1	70
2	2	0
3	3	0
3	2	10
4	1	80
2	1	10
3	4	20
2	4	60
4	2	80
1	4	90
1	3	60
4	3	30
4	4	0
1	2	20

## Sheet: Sub2
3	3	5
1	4	40
4	1	45
3	4	7
1	2	30
3	1	40
2	4	45
2	1	15
2	2	5
4	3	13
1	3	45
4	2	20
3	2	20
4	4	5
2	3	0
1	1	0
3	4	7
3	1	15
2	2	5
4	2	20
3	2	20
2	4	30
3	3	5
1	2	15
4	1	40
2	3	35
2	1	10
1	4	50
4	4	47
1	3	43
1	1	5
4	3	10
3	4	5
1	3	5
2	1	20
3	2	7
4	3	5
1	2	5
1	1	15
2	3	10
4	4	0
2	2	10
3	3	0
4	2	15
3	1	30
4	1	35
1	4	45
2	4	7
2	4	13
1	1	5
4	2	5
1	4	40
4	3	10
3	1	40
2	3	15
1	2	5
2	1	0
2	2	5
1	3	35
3	3	0
4	1	40
4	4	5
3	2	10
3	4	5

## Sheet: Sub3
4	1	50
4	2	50
4	4	30
1	4	100
3	4	30
2	1	20
3	3	20
3	2	30
4	3	30
1	1	0
2	3	10
3	1	80
1	3	80
2	2	50
2	4	100
1	2	80
2	3	20
1	2	30
2	2	10
4	3	10
4	1	80
2	1	20
3	2	20
3	3	0
1	3	50
4	4	0
1	1	0
3	1	50
2	4	50
3	4	50
1	4	100
4	2	30
2	4	50
2	3	50
2	2	10
1	3	100
4	3	10
4	1	50
3	3	0
1	2	0
2	1	20
4	4	0
3	1	80
3	2	30
3	4	10
1	1	0
1	4	80
4	2	30
1	2	10
4	4	0
2	2	0
2	3	10
4	3	10
3	2	20
3	4	20
1	3	80
2	1	30
1	4	80
3	1	70
4	2	50
3	3	0
4	1	100
2	4	80
1	1	0

## Sheet: Sub4
4	2	5
3	3	3
1	3	7
1	2	6
2	4	10
1	1	3
3	4	5
4	1	10
2	3	4
4	4	4
3	1	2
1	4	10
2	1	0
4	3	3
3	2	1
2	2	0
4	1	7
3	1	1
1	2	0
2	2	0
1	1	1
3	4	0
3	2	0
2	1	1
2	4	5
4	2	5
2	3	3
1	4	5
1	3	3
3	3	3
4	4	0
4	3	3
2	1	1
3	3	0
4	3	3
2	3	3
2	2	0
3	1	3
1	1	0
1	3	5
1	2	0
3	4	5
3	2	3
1	4	10
4	4	0
2	4	5
4	1	10
4	2	5
4	2	5
4	4	0
1	4	10
3	3	0
3	1	5
4	3	0
1	2	5
4	1	10
3	2	3
1	3	10
3	4	0
2	1	3
2	3	3
2	4	3
1	1	0
2	2	0

## Sheet: Sub5
3	4	30
2	2	20
3	1	50
4	2	60
1	2	30
4	3	50
4	1	80
4	4	20
2	4	80
1	3	30
3	2	30
2	3	20
3	3	10
1	1	0
2	1	10
1	4	80
2	1	30
2	2	10
1	2	20
1	4	70
2	4	70
4	4	20
4	2	60
1	3	40
3	2	40
2	3	10
4	3	30
1	1	10
3	4	20
3	3	0
3	1	40
4	1	80
3	2	50
3	3	5
4	2	70
2	4	70
4	4	10
3	1	30
2	3	30
1	1	0
2	1	15
1	4	80
2	2	10
1	3	30
4	3	40
1	2	10
4	1	90
3	4	20
1	4	70
3	3	5
1	1	0
2	2	5
3	1	25
3	2	35
4	1	50
2	4	55
4	2	70
3	4	45
2	1	30
2	3	15
1	2	5
4	3	35
1	3	10
4	4	5

## Sheet: Sub6
3	4	10
4	3	20
1	3	10
3	2	10
4	2	20
3	1	20
3	3	0
2	4	30
4	1	30
1	2	10
1	4	30
2	1	10
1	1	0
4	4	0
2	3	10
2	2	0
1	3	10
1	1	0
1	4	20
2	2	0
1	2	10
4	1	30
4	2	10
3	3	0
3	4	10
2	1	10
2	3	10
3	1	10
2	4	20
4	4	0
3	2	10
4	3	0
2	1	10
2	2	0
2	3	10
1	2	0
3	4	10
4	1	20
1	1	0
4	3	10
3	2	10
4	2	20
3	1	10
3	3	0
2	4	20
4	4	0
1	3	10
1	4	30
3	3	0
4	3	10
3	1	20
1	2	10
4	2	20
2	3	0
2	4	20
4	4	0
1	1	0
1	3	20
3	2	10
2	2	0
1	4	20
4	1	30
2	1	10
3	4	10

## Sheet: Sub7
1	3	70
3	3	60
4	1	50
2	4	50
3	1	40
1	2	40
1	4	30
2	1	30
4	4	70
1	1	40
4	2	30
4	3	20
2	3	10
3	2	10
2	2	10
3	4	0
1	3	20
2	3	20
4	2	40
3	2	0
3	3	0
1	1	10
4	3	10
1	4	30
2	2	0
3	4	30
1	2	0
4	4	10
2	1	10
2	4	20
3	1	40
4	1	40
3	2	20
1	4	30
4	1	30
2	1	0
3	3	0
2	2	0
2	4	40
1	1	20
4	4	0
1	3	30
3	1	30
3	4	10
4	3	10
2	3	0
1	2	20
4	2	50
1	2	0
3	2	10
2	4	40
4	2	60
2	1	40
3	1	30
2	3	0
3	4	30
4	1	50
4	3	20
1	4	40
2	2	0
1	1	0
1	3	50
4	4	0
3	3	10

## Sheet: Sub8
3	4	10
3	1	30
1	4	100
1	3	80
4	4	0
4	1	80
3	3	20
4	3	40
2	2	20
4	2	60
2	3	40
1	1	0
3	2	60
2	1	20
2	4	80
1	2	20
3	1	40
1	3	60
4	1	80
4	3	60
3	4	40
2	3	20
2	2	0
4	2	60
3	3	0
1	2	20
3	2	40
1	4	80
2	1	20
1	1	0
2	4	80
4	4	0
1	4	80
2	2	20
4	1	80
1	3	40
4	4	0
3	2	20
2	4	40
4	3	0
2	1	20
1	2	0
3	4	10
4	2	60
1	1	20
2	3	20
3	3	0
3	1	60
3	3	0
4	1	80
2	1	20
1	4	100
2	2	20
3	4	20
4	4	0
4	3	20
3	1	80
2	3	20
1	3	60
4	2	40
1	1	20
1	2	20
2	4	20
3	2	40

## Sheet: Sub9
3	4	15
2	4	50
3	2	40
3	1	25
2	3	15
4	3	20
1	3	40
3	3	10
1	1	0
4	4	0
4	2	50
4	1	70
1	4	80
2	1	15
2	2	0
1	2	10
2	2	0
2	4	10
4	1	80
2	1	0
4	3	10
2	3	0
3	3	15
4	4	15
1	1	0
1	4	90
1	2	15
3	1	50
4	2	60
3	4	10
1	3	50
3	2	15
2	1	10
1	2	20
1	1	0
3	4	20
2	4	30
4	3	30
4	4	0
4	1	90
3	3	10
1	3	60
1	4	70
3	2	30
2	3	20
3	1	50
4	2	60
2	2	0
2	2	25
3	3	10
4	4	0
2	1	15
1	3	5
4	1	40
4	3	10
3	1	40
3	4	20
1	4	60
1	2	10
3	2	10
4	2	30
2	4	20
2	3	15
1	1	10

## Sheet: Sub10
4	2	50
1	4	70
2	4	60
4	1	80
3	2	40
1	1	10
1	3	30
3	3	30
2	1	40
4	3	20
2	3	10
2	2	0
3	1	40
4	4	0
3	4	10
1	2	20
3	3	0
2	1	50
1	3	80
4	4	0
2	4	20
4	1	60
3	2	10
4	3	10
3	1	60
1	1	0
2	3	0
2	2	0
1	2	30
3	4	30
4	2	60
1	4	100
1	3	80
1	2	0
2	3	20
2	2	0
4	3	20
1	4	100
3	4	30
4	4	0
3	3	20
4	1	60
2	4	80
4	2	80
2	1	60
1	1	0
3	1	30
3	2	20
1	1	20
1	4	80
4	1	80
2	1	20
1	2	20
4	4	0
4	3	20
3	3	0
3	2	20
1	3	40
3	4	20
3	1	20
2	2	0
4	2	40
2	3	20
2	4	60

[truncated: 15 more sheets: Sub11, Sub12, Sub13, Sub14, Sub15, Sub16, Sub17, Sub18, Sub19, Sub20, Sub21, Sub22, Sub23, Sub24, Sub25]
